# Supplementary material
Source: publisher figshare collection journal article supplement (https://acs.figshare.com/ndownloader/files/21256683)
Supplement: Supplementary file 1 [file 21256683]

# Supporting Information

## **Rational Molecular Design of Electrocatalysts Based on Single-Atom Modified Covalent Organic Frameworks for Efficient Oxygen Reduction Reaction**

*Kazuyuki Iwase,<sup>†,‡</sup> Shuji Nakanishi<sup>‡,§</sup> Masaru Miyayama<sup>†</sup> and Kazuhide Kamiya,<sup>\*,‡,§<sup>1</sup></sup>*

*<sup>†</sup>Department of Applied Chemistry, The University of Tokyo, 7-3-1 Hongo, Bunkyo-ku, Tokyo 113-8656, Japan.*

*<sup>‡</sup>Research Center for Solar Energy Chemistry, Osaka University, 1-3 Machikane-yama, Toyonaka, Osaka 560-8531, Japan.*

*<sup>§</sup> Graduate School of Engineering Science, Osaka University, 1-3 Machikaneyama, Toyonaka, Osaka 560-8531, Japan.*

*<sup>1</sup> Japan Science and Technology Agency (JST) PRESTO, 4-1-8 Honcho, Kawaguchi, Saitama 332-0012, Japan.*

*\*E-mail for K.K.: [kamiya@chem.es.osaka-u.ac.jp](mailto:kamiya@chem.es.osaka-u.ac.jp).*

## Supporting Tables and Figures

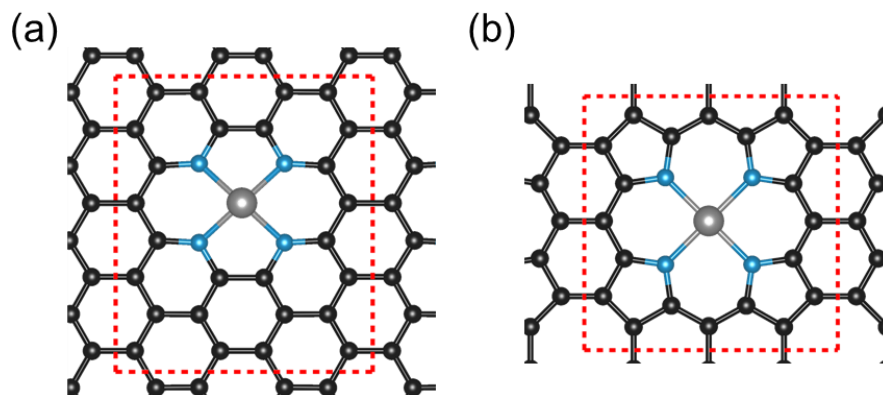

**Figure S1.** Model structures of graphitic materials with metal centers coordinated by 4 N atoms, which are designed by following previous reports by F. Calle-Vallejo et al.<sup>1,2</sup> (a) Graphitic material type a and (b) Graphitic materials type b. Gray; transition metal atoms (M), black: C, blue: N and red: O. Red dotted lines represent the unit cell for each structure model.

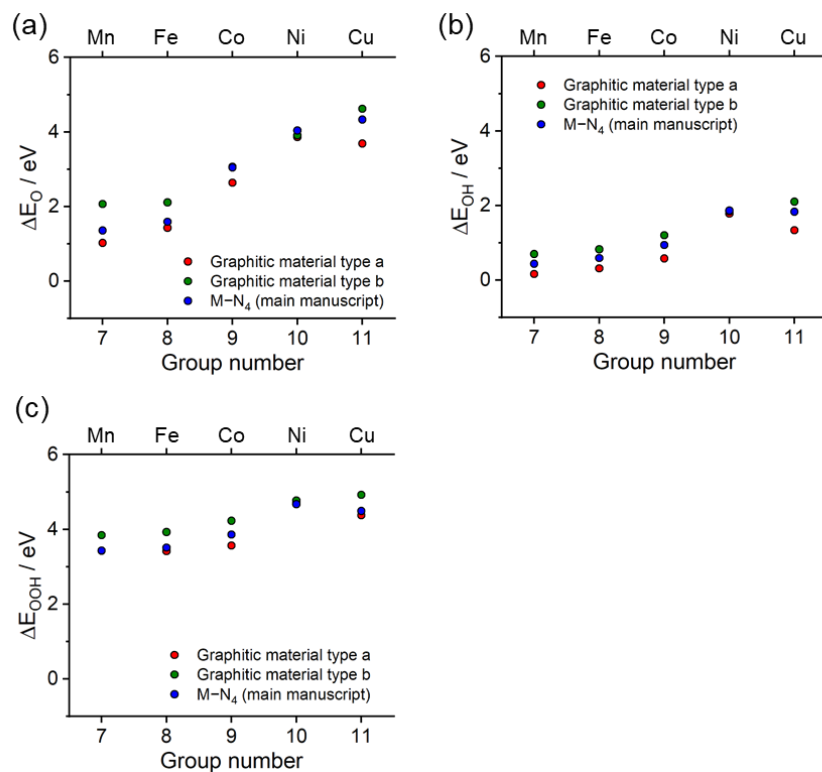

**Figure S2.** Adsorption energies of ORR intermediates ( $\Delta E_{\text{ads}}$ ) to metal centers ((a) O, (b) OH and (c) OOH) using graphitic material models shown in Figure S1. Red symbols: graphitic materials type a, green symbols: graphitic materials type b. Blue symbols represent the replotted value of M-N<sub>4</sub> in the main manuscript for the comparison.

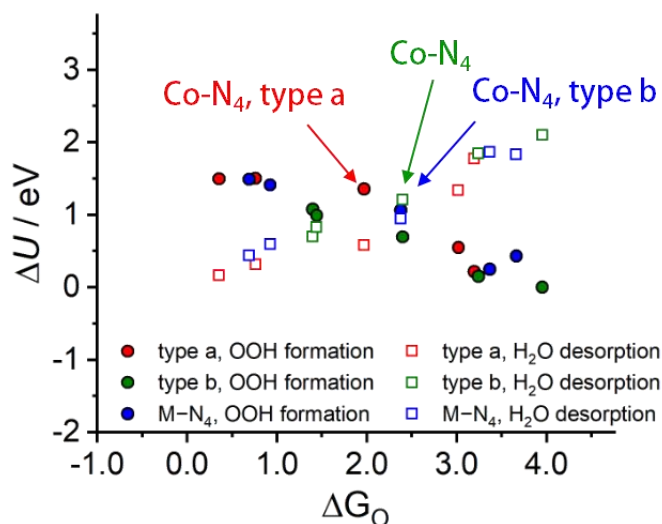

**Figure S3.** Potential plots for the limiting steps of the ORR against the  $\Delta G_O$  of metal-nitrogen doped graphitic materials shown in Figure S1. The y axis is calculated based on the equation in the Computational details section. Potentials for M-N<sub>4</sub> in the main manuscript are re-plotted for the comparison.

**Table S1.** ZPE, TS and  $E_{\text{solvation}}$  used in this study to calculate formation energy ( $\Delta G$ ) of ORR intermediates. The value is taken from previous reports.<sup>3-6</sup>

| Species (phase)     | ZPE                | TS                 | $E_{\text{solvation}}$ |
|---------------------|--------------------|--------------------|------------------------|
| H <sub>2</sub> (g)  | 0.27 <sup>a</sup>  | 0.404 <sup>a</sup> | - <sup>a</sup>         |
| H <sub>2</sub> O(l) | 0.574 <sup>a</sup> | 0.583 <sup>a</sup> | -0.087 <sup>a</sup>    |
| OH*                 | 0.332 <sup>a</sup> | - <sup>a</sup>     | -0.38 <sup>c</sup>     |
| OOH*                | 0.428 <sup>a</sup> | - <sup>a</sup>     | -0.47 <sup>c</sup>     |
| O*                  | 0.07 <sup>b</sup>  | - <sup>b</sup>     | -0.70 <sup>c</sup>     |
| O <sub>2</sub>      | 0.08 <sup>c</sup>  | -                  | -0.41 <sup>c</sup>     |

a: Ref. 3, b: Ref. 4, c: Ref. 5,6.

**Table S2.** Stabilization energies ( $E_{\text{stabilize}}$ ) of metal ions for M-N<sub>2</sub>, M-N<sub>3</sub>, M-N<sub>4</sub>. Metal atoms on pristine graphene and bulk metals are calculated as references. Every value in this table is described in eV unit.

|    | M-N <sub>2</sub> | M-N <sub>3</sub> | M-N <sub>4</sub> | M on pristine Graphene | M on bulk metals  |
|----|------------------|------------------|------------------|------------------------|-------------------|
| Mn | -1.81            | -2.59            | -8.72            | -0.10                  | n.c. <sup>a</sup> |
| Fe | -2.03            | -2.96            | -9.20            | -0.79                  | -4.88             |
| Co | -2.72            | -3.25            | -9.29            | -0.96                  | n.c. <sup>a</sup> |
| Ni | -2.69            | -3.17            | -8.86            | -1.18                  | n.c. <sup>a</sup> |
| Cu | -1.84            | -2.31            | -7.05            | -0.06                  | -4.58             |

n.c.<sup>a</sup> : not calculated

Note: These values are similar with those in the previous reports about low-coordination metal sites (CN=2 or 3).<sup>7-9</sup> As predicted, lower-coordination metals became more unstable. Some metal centers in M-COFs are less stable than those on bulk metals. This result means that single metal sites in M-COFs are metastable. However, metal atoms in COFs with low CN (CN=2, 3) are obviously more stable than metal atoms embedded on pristine graphene as references. Considering these  $E_{\text{stabilize}}$  values, M-COF are stable enough to employ these single-atom-modified COFs as the model structure for the calculation.

**Table S3.** Effect of the addition of Hubbard correction ( $U$ ) to the 3d electrons.  $\Delta E_O$  values in the main manuscript are also shown as references.

|    | $\Delta E_O$ by GGA + $U$ method |                  |                  | $\Delta E_O$ in the main manuscript |                  |                  |
|----|----------------------------------|------------------|------------------|-------------------------------------|------------------|------------------|
|    | M-N <sub>2</sub>                 | M-N <sub>3</sub> | M-N <sub>4</sub> | M-N <sub>2</sub>                    | M-N <sub>3</sub> | M-N <sub>4</sub> |
| Co | 1.45                             | 1.69             | 4.32             | 0.16                                | 0.81             | 3.05             |
| Cu | 1.93                             | 2.54             | 4.51             | 1.36                                | 1.90             | 4.33             |

Note: GGA +  $U$  with a  $U$  value of 5 eV was applied to 3d electron of metal centers. 5 eV was chosen from previous study which reported GGA +  $U$  calculation results on SAC with Cu-N<sub>3</sub> like local structure.<sup>10</sup> The same tendency of  $\Delta E_O$ , CN and d electron number dependence, was observed even in GGA +  $U$  method. However, the absolute values show certain difference from the results obtained in the method without +  $U$  for both M-COFs. This result indicates that further analysis by using various kind of base function and/or DFT method can be a future work of this study.

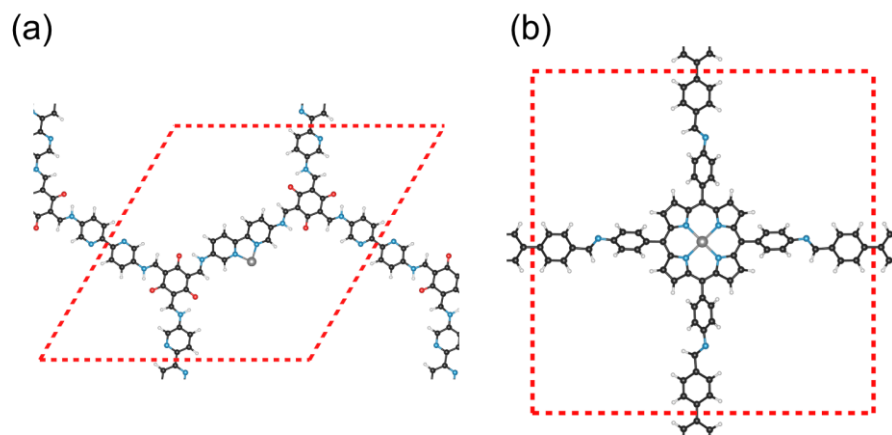

**Figure S4.** Model structure employed in this study. (a) Bipyridine-type unit cells similar molecular structure to  $M-N_2$  in the main manuscript based on the reported COF by Banerjee et al.<sup>11</sup> (named  $M-N_2-2$ ) and (b) porphyrin-type unit cell similar molecular structure to  $M-N_4$  based on the reported COF by Yaghi et al.<sup>12</sup> (named  $M-N_4-2$ ). Both images display the structures after structural optimization. Gray: transition metal atoms (M), black: C, white: H, blue: N, red: O. The red dotted lines represent the unit cell for each structural model.

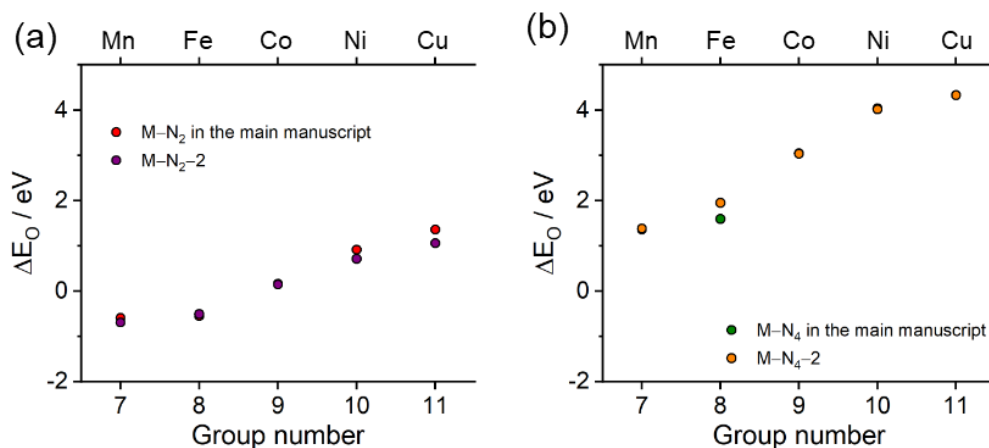

**Figure S5.** Adsorption energies of O atom ( $\Delta E_{ads}$ ) to metal centers using previous reported COF structure shown in Figure S4.  $\Delta E_O$  of  $M$ -COFs for (a)  $M-N_2-2$ , and (b)  $M-N_4-2$ . For both graphs,  $\Delta E_O$  value of  $M-N_2$  or  $M-N_4$  in the main manuscript are also re-plotted for the comparison.

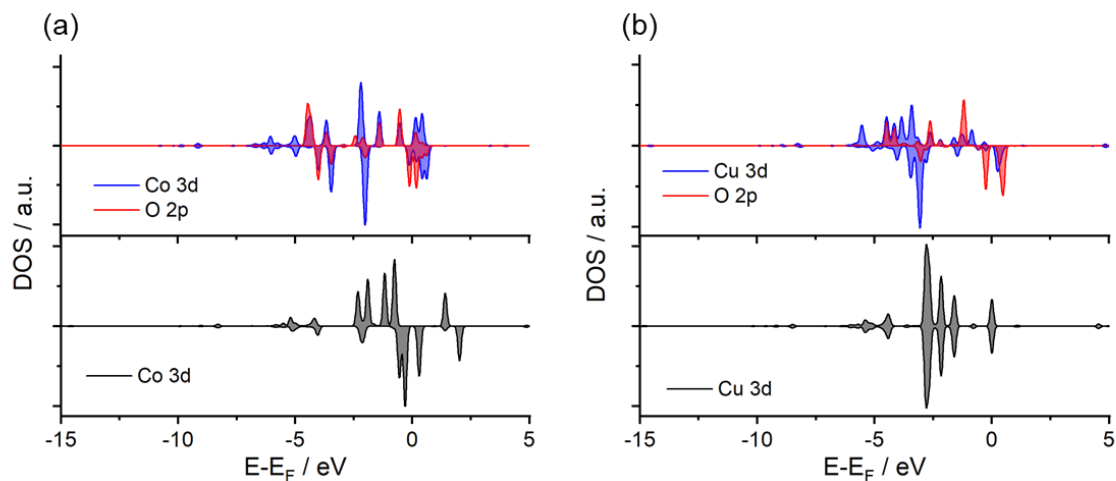

**Figure S6.** Representative PDOS of (a) Co-N<sub>4</sub> and (b) Cu-N<sub>4</sub>. For both figures, upper parts (colored lines) represent the PDOS of M-N<sub>4</sub> with O atoms (\*O) and bottom parts (black lines) represent M-N<sub>4</sub> without adsorbates. Blue lines and red lines represent the d orbitals of metal atoms in M-N<sub>4</sub> and p orbitals of O atoms of O adsorbed M-N<sub>4</sub>, respectively.



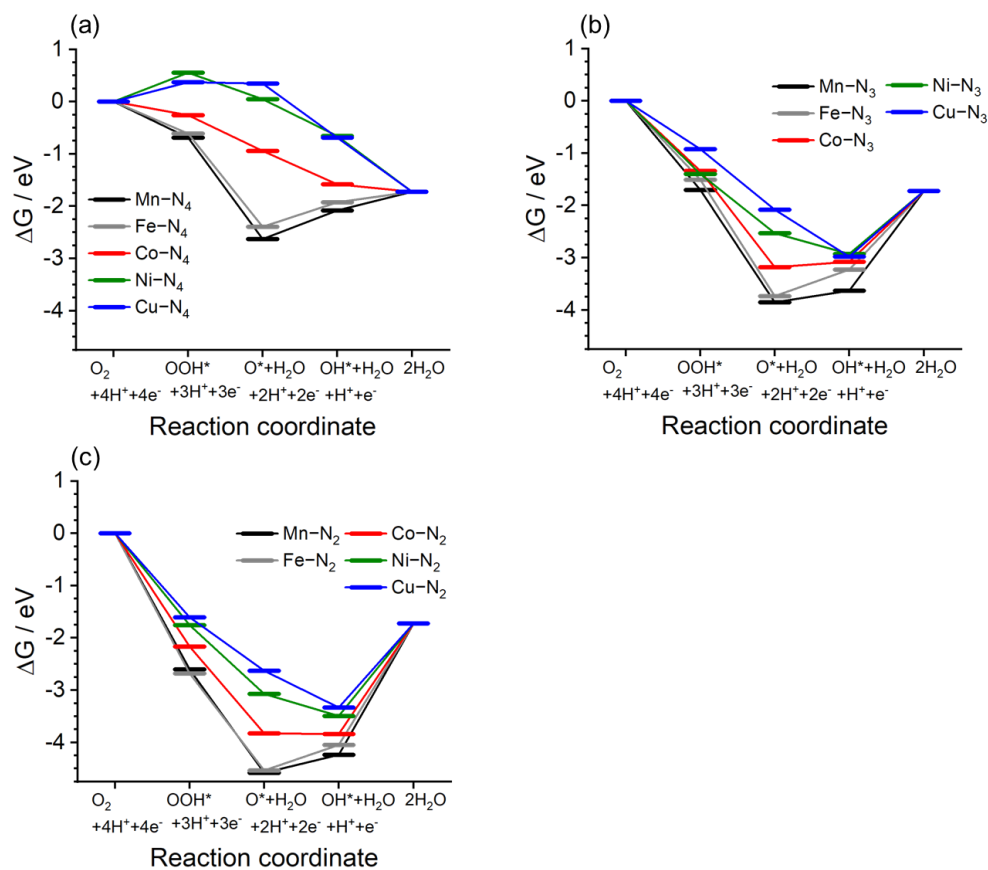

**Figure S7.** Free energy diagram for each reaction coordinate for ORR. (a) M-N<sub>4</sub>, (b) M-N<sub>3</sub> and (c) M-N<sub>2</sub>. Electrode potential = 0.8 V vs. CHE.

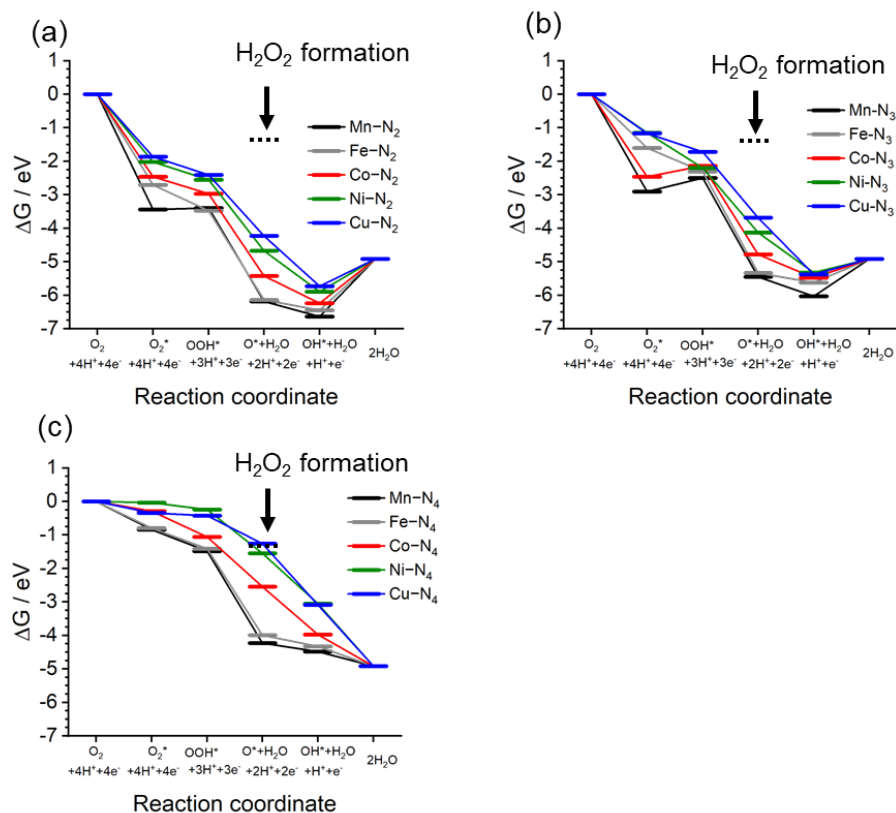

**Figure S8.** Free energy diagrams for each reaction coordinate for ORR including  $\text{O}_2$  molecule adsorption steps and  $\text{H}_2\text{O}_2$  formation steps. (a)  $\text{M}-\text{N}_2$ , (b)  $\text{M}-\text{N}_3$  and (c)  $\text{M}-\text{N}_4$ . Electrode potential = 0 V vs. CHE.

Note: In these diagrams, the  $\text{H}_2\text{O}_2$  formation energy is set to 1.36 eV ( $= 0.68 \times 2$ ). As shown in this figure, only  $\text{Cu}-\text{N}_4$  and  $\text{Ni}-\text{N}_4$  possibly catalyze  $\text{H}_2\text{O}_2$  formation. Thus, the  $4\text{e}^-$  process,  $\text{H}_2\text{O}$  formation is more favorable than  $2\text{e}^-$  process ( $\text{H}_2\text{O}_2$  formation) for most of  $\text{M}-\text{COFs}$ .

$\text{O}_2$  adsorption step was calculated to check whether the  $\text{O}_2$  adsorption step affects a rate-determining step for ORR or not. First, the adsorption of  $\text{O}_2$  molecule is exothermic for all  $\text{M}-\text{COFs}$ . In addition, for the  $\text{M}-\text{COFs}$  on the left-hand side of the volcano in Figure 6 (*i.e.* the  $\text{H}_2\text{O}$  formation from  $\text{OH}^*$  is the rate determining), the energy barrier of the formation of  $\text{OOH}^*$  from adsorbed  $\text{O}_2$  was equal to or smaller than that of the  $\text{H}_2\text{O}$  formation from  $\text{OH}^*$ . These results indicate that our conclusion about the rate-determining steps were not affected even when considering the  $\text{O}_2$  adsorption.

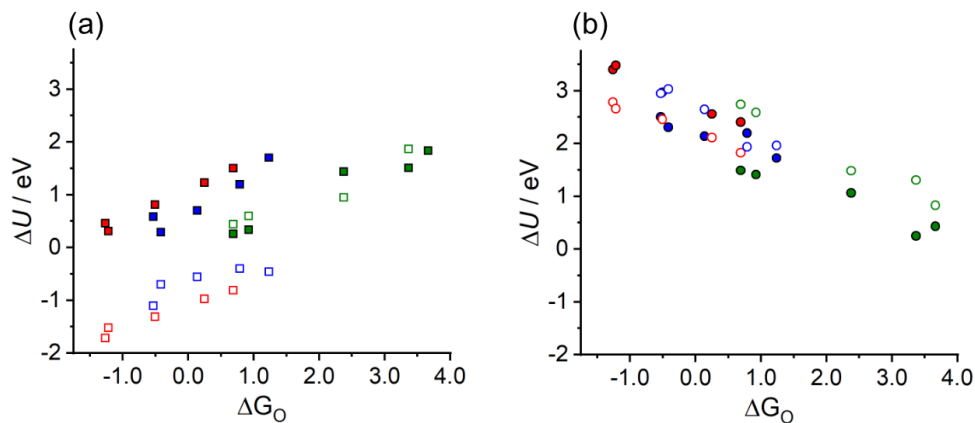

**Figure S9.** Potential plots for limiting steps of ORR against  $\Delta G_O$ . (a) Desorption step for  $H_2O$  (open square) and  $OH^*$  formation (closed square). (b) formation step of  $OOH^*$  (closed circle) and  $O^*$  formation (open circle). For both graphs, red:  $M-N_2$ , blue:  $M-N_3$  and green:  $M-N_4$ .

Note: Basically, (a)  $OH^*$  formation (closed square) is more positive than  $H_2O$  formation (open square) more than 2.35 eV and (b)  $O^*$  formation (open circle) is more positive than  $OOH^*$  formation (closed circle) less than 2.35 eV. This means that either  $H_2O$  formation or  $OOH^*$  formation is limiting potential steps for ORR among  $M$ -COF catalysts as described in main manuscript. The limiting potential for  $OH^*$  ( $\Delta U_3$ ) and  $O^*$  ( $\Delta U_4$ ) is calculated as shown below.

$$\Delta U_3 = -(\Delta G_{OH} - \Delta G_O)$$

$$\Delta U_4 = -(\Delta G_O - \Delta G_{OOH})$$

**Table S4**  $\Delta E_{\text{ads}}$  of ORR intermediates calculated in this study.

| <b>(M-N<sub>2</sub>)</b> | <b>O</b>     | <b>OH</b>    | <b>OOH</b>  |
|--------------------------|--------------|--------------|-------------|
| <b>Mn</b>                | <b>-0.59</b> | <b>-1.70</b> | <b>1.57</b> |
| <b>Fe</b>                | <b>-0.55</b> | <b>-1.51</b> | <b>1.49</b> |
| <b>Co</b>                | <b>0.16</b>  | <b>-1.30</b> | <b>2.00</b> |
| <b>Ni</b>                | <b>0.92</b>  | <b>-0.95</b> | <b>2.41</b> |
| <b>Cu</b>                | <b>1.36</b>  | <b>-0.79</b> | <b>2.57</b> |

| <b>(M-N<sub>3</sub>)</b> | <b>O</b>    | <b>OH</b>    | <b>OOH</b>  |
|--------------------------|-------------|--------------|-------------|
| <b>Mn</b>                | <b>0.14</b> | <b>-1.09</b> | <b>2.47</b> |
| <b>Fe</b>                | <b>0.25</b> | <b>-0.69</b> | <b>2.67</b> |
| <b>Co</b>                | <b>0.81</b> | <b>-0.54</b> | <b>2.83</b> |
| <b>Ni</b>                | <b>1.46</b> | <b>-0.39</b> | <b>2.78</b> |
| <b>Cu</b>                | <b>1.90</b> | <b>-0.44</b> | <b>3.25</b> |

| <b>(M-N<sub>4</sub>)</b> | <b>O</b>    | <b>OH</b>   | <b>OOH</b>  |
|--------------------------|-------------|-------------|-------------|
| <b>Mn</b>                | <b>1.36</b> | <b>0.45</b> | <b>3.48</b> |
| <b>Fe</b>                | <b>1.59</b> | <b>0.61</b> | <b>3.56</b> |
| <b>Co</b>                | <b>3.05</b> | <b>0.96</b> | <b>3.91</b> |
| <b>Ni</b>                | <b>4.04</b> | <b>1.88</b> | <b>4.72</b> |
| <b>Cu</b>                | <b>4.33</b> | <b>1.85</b> | <b>4.54</b> |

**Table S5** Collected data of solvation energies of ORR intermediates for molecular catalysts used in previous studies.

|      | Value  | Material            |
|------|--------|---------------------|
| O*   | − 0.7  | This study          |
|      | 0.23   | BN <sup>a</sup>     |
|      | − 0.15 | Fe-Pc <sup>b</sup>  |
|      | − 0.76 | Cu/CTF <sup>c</sup> |
|      | − 0.53 | N-C <sup>d</sup>    |
|      | -      | M-Nx <sup>e</sup>   |
| OH*  | − 0.38 | This study          |
|      | − 0.62 | BN <sup>a</sup>     |
|      | − 0.2  | Fe-Pc <sup>b</sup>  |
|      | − 0.61 | Cu/CTF <sup>c</sup> |
|      | − 0.42 | N-C <sup>d</sup>    |
|      | − 0.3  | M-Nx <sup>e</sup>   |
| OOH* | − 0.47 | This study          |
|      | − 1.18 | BN <sup>a</sup>     |

|       |                     |
|-------|---------------------|
| -0.17 | Fe-Pc <sup>b</sup>  |
| -0.38 | Cu/CTF <sup>c</sup> |
| -0.49 | N-C <sup>d</sup>    |
| -0.3  | M-Nx <sup>e</sup>   |

a: Ref. 13, b: Ref. 14, c: Ref. 10, d: Ref. 15, e: Ref. 16

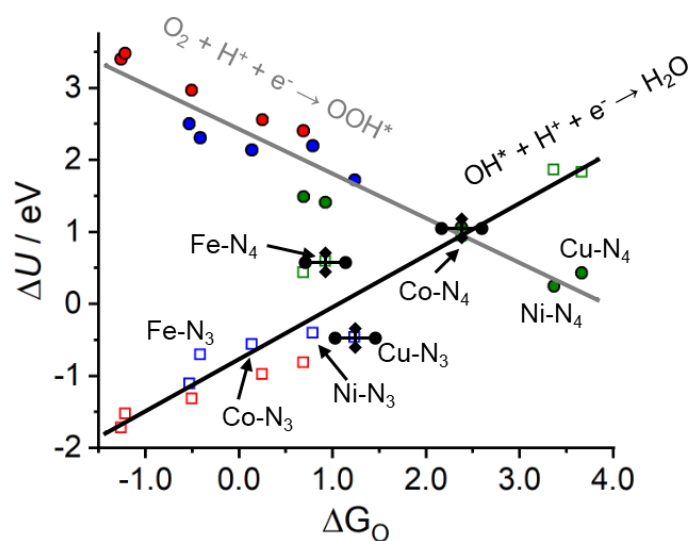

**Figure S10.** Replotted potential plots for the limiting steps of the ORR against the  $\Delta G_{\text{ads}}$  values with error bars for Cu-N<sub>3</sub>, Co-N<sub>4</sub> and Fe-N<sub>4</sub>. Error bars represent the mean absolute errors of 5 or 6 values for

solvation energies of O\*, OH\* and OOH\*.

## References

- (1) Calle-Vallejo, F.; Martínez, J. I.; Rossmeisl, J., Density functional studies of functionalized graphitic materials with late transition metals for oxygen reduction reactions. *Phys. Chem. Chem. Phys.* **2011**, *13* (34), 15639-15643.
- (2) Calle-Vallejo, F.; Martínez, J. I.; García-Lastra, J. M.; Abad, E.; Koper, M. T. M., Oxygen reduction and evolution at single-metal active sites: Comparison between functionalized graphitic materials and protoporphyrins. *Surf. Sci.* **2013**, *607*, 47-53.
- (3) Calle-Vallejo, F.; Tymoczko, J.; Colic, V.; Vu, Q. H.; Pohl, M. D.; Morgenstern, K.; Loffreda, D.; Sautet, P.; Schuhmann, W.; Bandarenka, A. S., Finding optimal surface sites on heterogeneous catalysts by counting nearest neighbors. *Science* **2015**, *350* (6257), 185-189.
- (4) Nørskov, J. K.; Rossmeisl, J.; Logadottir, A.; Lindqvist, L.; Kitchin, J. R.; Bligaard, T.; Jónsson, H., Origin of the overpotential for oxygen reduction at a fuel-cell cathode. *J. Phys. Chem. B* **2004**, *108* (46), 17886-17892.
- (5) Kattel, S.; Atanassov, P.; Kiefer, B., Catalytic activity of Co-N(x)/C electrocatalysts for oxygen reduction reaction: a density functional theory study. *Phys. Chem. Chem. Phys.* **2013**, *15* (1), 148-153.
- (6) Sha, Y.; Yu, T. H.; Liu, Y.; Merinov, B. V.; Goddard, W. A., Theoretical study of solvent effects on the platinum-catalyzed oxygen reduction reaction. *J. Phys. Chem. Lett.* **2010**, *1* (5), 856-861.
- (7) Kattel, S.; Atanassov, P.; Kiefer, B., Density functional theory study of Ni-Nx/C electrocatalyst for oxygen reduction in alkaline and acidic media. *J. Phys. Chem. C* **2012**, *116* (33), 17378-17383.
- (8) Zheng, Y.; Jiao, Y.; Zhu, Y.; Cai, Q.; Vasileff, A.; Li, L. H.; Han, Y.; Chen, Y.; Qiao, S. Z., Molecule-level g-C<sub>3</sub>N<sub>4</sub> coordinated transition metals as a new class of electrocatalysts for oxygen electrode reactions. *J. Am. Chem. Soc.* **2017**, *139* (9), 3336-3339.
- (9) Cui, X.; An, W.; Liu, X.; Wang, H.; Men, Y.; Wang, J., C<sub>2</sub>N-graphene supported single-atom catalysts for CO<sub>2</sub> electrochemical reduction reaction: mechanistic insight and catalyst screening. *Nanoscale* **2018**, *10* (32), 15262-15272.
- (10) Patel, A. M.; Ringe, S.; Siahrostami, S.; Bajdich, M.; Nørskov, J. K.; Kulkarni, A. R., Theoretical approaches to describing the oxygen reduction reaction activity of single-atom catalysts.

*J. Phys. Chem. C* **2018**, 122 (51), 29307-29318.

(11) Aiyappa, H. B.; Thote, J.; Shinde, D. B.; Banerjee, R.; Kurungot, S., Cobalt-modified covalent organic framework as a robust water oxidation electrocatalyst. *Chem. Mater.* **2016**, 28 (12), 4375-4379.

(12) Lin, S.; Diercks, C. S.; Zhang, Y. B.; Kornienko, N.; Nichols, E. M.; Zhao, Y.; Paris, A. R.; Kim, D.; Yang, P.; Yaghi, O. M.; Chang, C. J., Covalent organic frameworks comprising cobalt porphyrins for catalytic CO<sub>2</sub> reduction in water. *Science* **2015**, 349 (6253), 1208-1213.

(13) Lyalin, A.; Nakayama, A.; Uosaki, K.; Taketsugu, T., Theoretical predictions for hexagonal BN based nanomaterials as electrocatalysts for the oxygen reduction reaction. *Phys. Chem. Chem. Phys.* **2013**, 15 (8), 2809-2820.

(14) Mussell, S.; Choudhury, P., Density functional theory study of iron phthalocyanine porous layer deposited on graphene substrate: A Pt-free electrocatalyst for hydrogen fuel cells. *J. Phys. Chem. C* **2016**, 120 (10), 5384-5391.

(15) Yu, L.; Pan, X.; Cao, X.; Hu, P.; Bao, X., Oxygen reduction reaction mechanism on nitrogen-doped graphene: A density functional theory study. *J. Catal.* **2011**, 282 (1), 183-190.

(16) Chan, Y.-T.; Tsai, M.-K., The role of metal-oxo intermediate to oxygen reduction reaction catalysis: A theoretical investigation using nitrogen-substituted carbon nanotube models. *Surf. Sci.* **2018**, 677, 301-305.
